# Supplementary material for: Three-level spaser for next-generation luminescent nanoprobe
Source: PubMed Central journal article supplement — Sci Adv. 2018 Aug 17;4(8):eaat0292. doi: 10.1126/sciadv.aat0292 (PMC6097815; doi:10.1126/sciadv.aat0292), 2018-08-17
Supplement: aat0292_SM.pdf [file aat0292_SM.pdf]

## Supplementary Materials for

### Three-level spaser for next-generation luminescent nanoprobe

Pei Song, Jian-Hua Wang, Miao Zhang, Fan Yang, Hai-Jie Lu, Bin Kang\*, Jing-Juan Xu\*, Hong-Yuan Chen\*

\*Corresponding author. Email: [binkang@nju.edu.cn](mailto:binkang@nju.edu.cn) (B.K.); [xujj@nju.edu.cn](mailto:xujj@nju.edu.cn) (J.-J.X.); [hychen@nju.edu.cn](mailto:hychen@nju.edu.cn) (H.-Y.C.)

Published 17 August 2018, *Sci. Adv.* **4**, eaat0292 (2018)

DOI: 10.1126/sciadv.aat0292

#### **This PDF file includes:**

Supplementary Text

Instruction of broadband time-resolved emission spectroscopy

Fig. S1. Schematic diagram of broadband time-resolved emission spectroscopy system.

Fig. S2. Molecular modeling of the dye.

Fig. S3. Photoluminescent spectrum measurement.

Fig. S4. Morphology characterization of the control samples.

Fig. S5. Pump-dependent steady-state emission and time-resolved emission spectra of dye solution.

Fig. S6. Electron transition dynamic spectrum of dye solution.

## Supplementary Text

### Instruction of broadband time-resolved emission spectroscopy

Before analysis, the synthesized spaser nanoprobe solution was placed into a quartz cuvette. The ns pulse laser ( $\lambda = 488 \text{ nm}$ ) was irradiated on the quartz cuvette with a spot size of  $\sim 1 \text{ cm}^2$ , while a spectrometer was placed on the vertical direction to monitor emission spectrum of the nanoprobe. In addition, a 500 nm long-pass filter was placed in front of the fiber collimator to eliminate the influence of scattering light from laser.

Time-resolved emission spectra of the nanoprobe were collected by using timing gate controlling technology. At time  $t = 0$ , ns pulse laser was irradiated on the sample, while a delayed ( $\Delta t$ ) TTL signal was generated by using DG645 to trigger the spectrometer working. Then the emission spectrum of spaser nanoprobe at time  $\Delta t$  was acquired, at a broad band from 500 to 900 nm. Hence, the whole time-resolved emission spectra of the nanoprobe were obtained, if changing the delayed time ( $\Delta t$ ) from DG645 in an order.

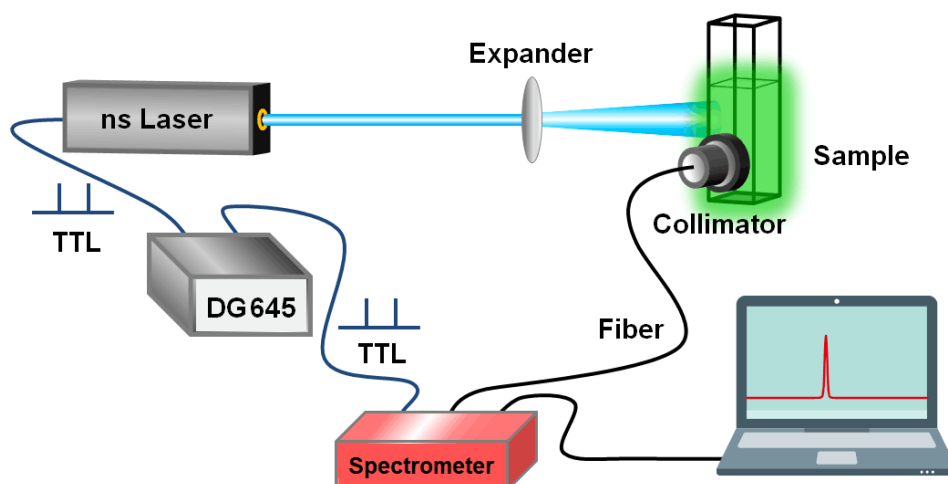

**Fig. S1. Schematic diagram of broadband time-resolved emission spectroscopy system.**

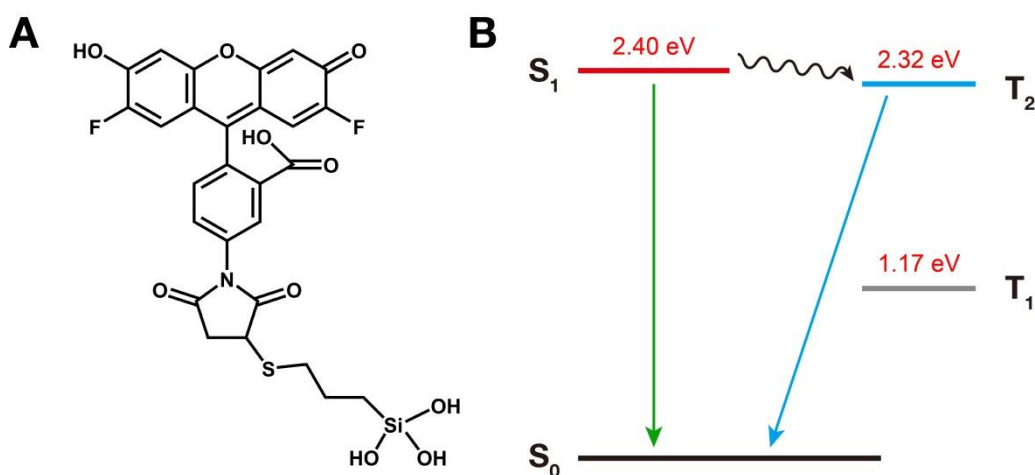

**Fig. S2. Molecular modeling of the dye.** (A) Molecular structure and (B) calculated energy diagram of the dye.

We calculated the energy level about the excited states of the used dye molecule by Gaussian 03 program.

Based on B3LYP/6-31G level, the ground state and each excited state of the system were geometrically optimized, and the vertical excitation energy and vertical emission energy were calculated by TD-DFT

method. All calculations take into account of the water environment through the PCM implicit solvation

model. As the reviewer predicted, the energy gap between  $S_1$  and  $T_1$  is huge ( $\Delta E_{(S_1-T_1)}=1.23$  eV), which is

adverse to the occurrence of intersystem crossing. However, the energy gap between  $S_1$  and  $T_2$  is very

small ( $\Delta E_{(S_1-T_2)} = 0.08$  eV), which is benefit for the intersystem crossing. Therefore, the triplet state

electrons more likely to accumulate at  $T_2$  state and transit to  $S_0$  accompanying phosphorescent emission

(calculated  $\lambda_{\max}=534$  nm), because the energy gap between  $T_1$  and  $T_2$  is as large as 1.15 eV, which would

against the internal conversion. Moreover, the faster transition rate of  $T_2$  ( $T_2 \rightarrow S_0$ ,  $\sim 7$  fold) than  $T_1$  is favor

of the phosphorescent emission from  $T_2$  to  $S_0$ . Certainly, the phosphorescent emission of  $T_1 \rightarrow S_0$  is still

exists, but its emission wavelength (1059 nm) is not in the visible region and too weak to be detected. It is

also important to note that such wavelength ( $\lambda_{(T_1 \rightarrow S_0)} \approx 1059$  nm) is far away from the resonance band

( $\sim 470-560$  nm) of plasmon cavity.

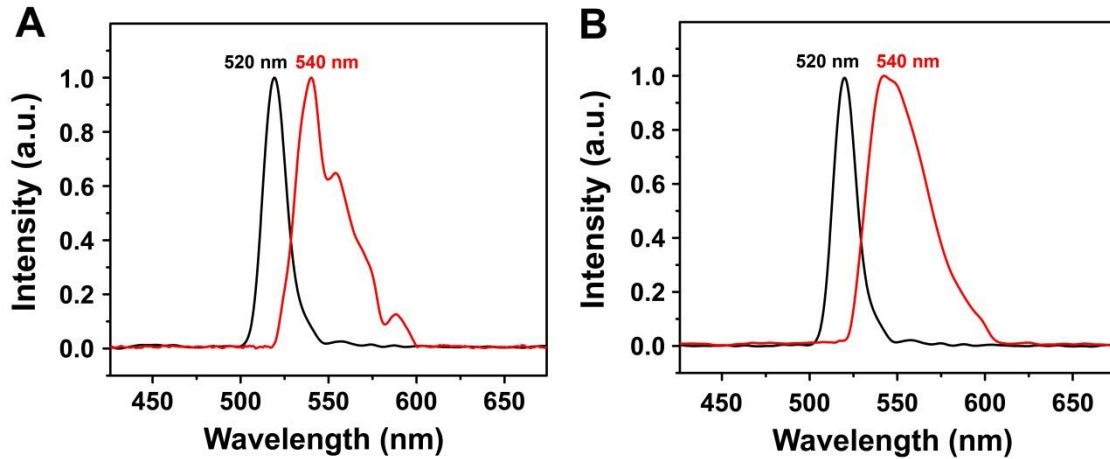

**Fig. S3. Photoluminescent spectrum measurement.** Fluorescence (black) and phosphorescence (red) emission spectra of dye solution (A) and dye-doped SiO<sub>2</sub> (B).

To measure the singlet-triplet energy gap, fluorescence and phosphorescence spectra of this dye were collected. Emission signals in the first 100 ns after pump was collected as fluorescence, and emission signals after 10  $\mu$ s were collected as phosphorescence. As seen, the fluorescence spectrum with a maximum emission ( $\lambda_{\text{max}}$ ) at 520 nm and the phosphorescence spectrum with a  $\lambda_{\text{max}}$  at 540 nm, suggesting a singlet-triplet energy gap of  $\sim 0.09$  eV.

Taking together, theoretical calculation suggested a singlet-triplet energy gap ( $\Delta E_{(S_1-T_2)}$ ) about  $\sim 0.08$  eV, and the observed emission at  $\lambda_{\text{max}} = 540$  nm was most likely from transition of  $T_2 \rightarrow S_0$ , which is an exception of Kasha's rule. This calculated result matched the experimental results very well.

All in all, based on the experimental results we observed and the calculation results, we believe the  $T_1$  state was not involved in the lasing mode selection and amplification processes, thus the gain medium of our current spaser is still a three-level system ( $S_0, T_2, S_1$ ).

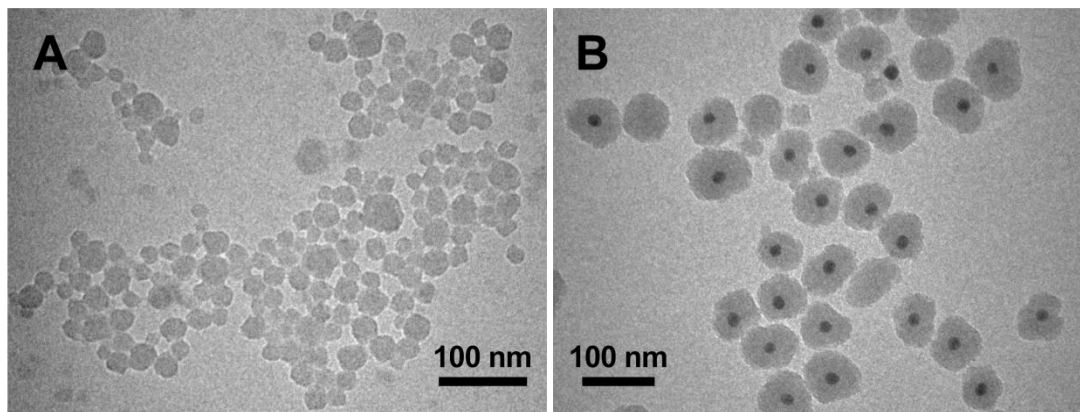

**Fig. S4. Morphology characterization of the control samples.** TEM images of dye-doped SiO<sub>2</sub> (A) and Au@SiO<sub>2</sub> (B).

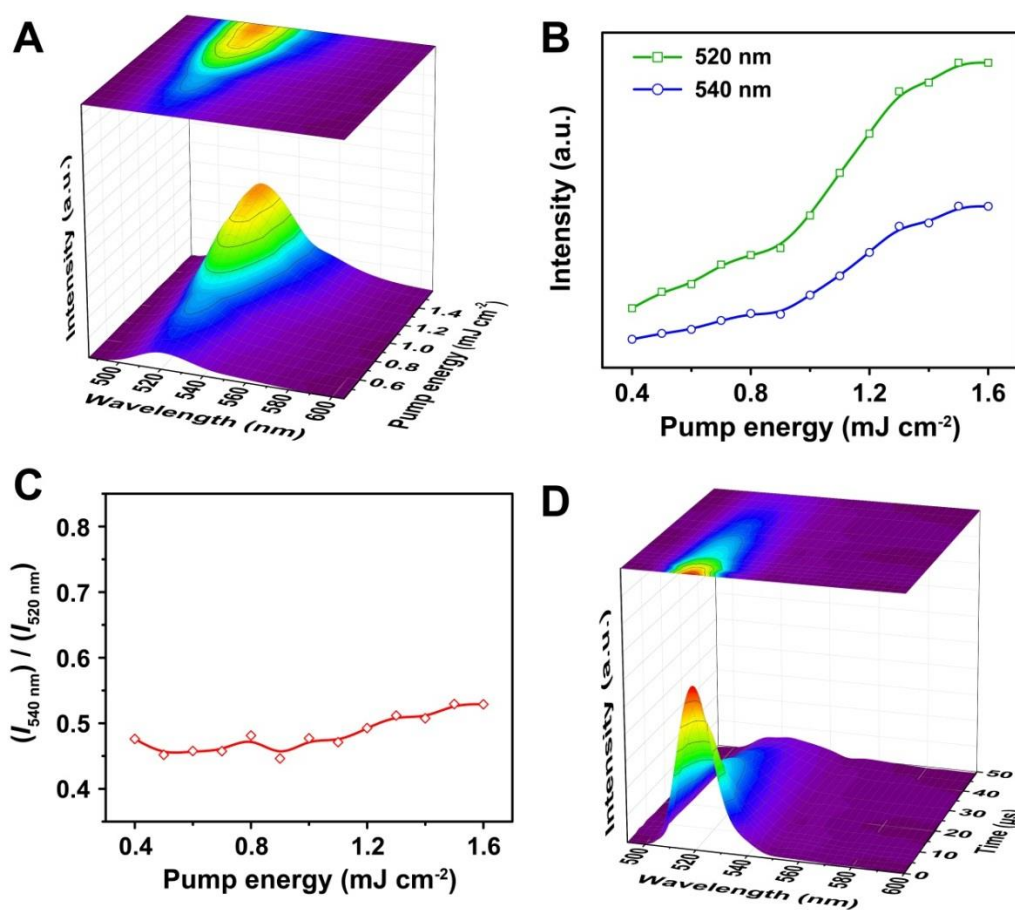

**Fig. S5. Pump-dependent steady-state emission and time-resolved emission spectra of dye solution.** (A) Emission spectra of the dye solution under pump energy from 0.4 to 1.6 mJ·cm<sup>-2</sup>. Curves of emission intensity at 520 nm and 540 nm (B) and their ratio (C) with the changing of pump energy. (D) Time-resolved emission spectra of dye under the identical pump condition as used in pumping dsDs spasers.

Neither electrons accumulation in  $T_2$  state nor promoted  $T_2$  emission was observed in pump-dependent spectra of dye in solution, and no pump threshold appeared. The reason might be that, in solution, dye molecules were free of motion and the interaction between molecules was relative weak, even the concentration is high. However, when doping dye molecules into  $\text{SiO}_2$ , the molecular motion was confined and the interaction between molecules could be strong at high dope concentration.

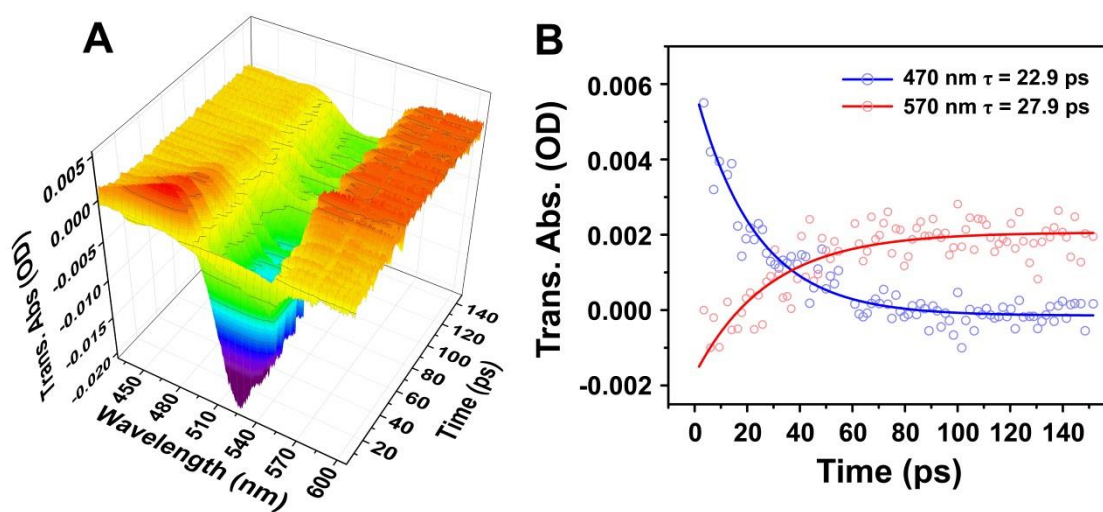

**Fig. S6. Electron transition dynamic spectrum of dye solution.** (A) Picosecond transient absorption spectra of dye solution. (B) Evolution of transient absorptive signature of  $S_1 \rightarrow S_n$  (470 nm,  $\tau = 22.9$  ps) and  $T_2 \rightarrow T_n$  (570 nm,  $\tau = 27.9$  ps) along with time. The dip around 490–530 nm could be attributed to the overlap of ground state absorption and fluorescence emission.

The transient absorption spectra of dye in solution was basically the same as dye-doped  $\text{SiO}_2$ . The decay of absorption band at 470 and 570 nm exhibited a slightly longer lifetime of  $\sim 22.9$  ps and  $\sim 27.9$  ps, respectively, compared to  $\sim 21.5$  ps and  $\sim 25.3$  ps in dye-doped  $\text{SiO}_2$ . This might be due to the high localized concentration and much strong inter-molecule interaction in dye-doped  $\text{SiO}_2$  than in solution.
